# Supplementary material for: Prevalence and Risk Factors of Childhood Hypertension in Urban-Rural Areas of China: A Cross-Sectional Study
Source: Hindawi journal article supplement (doi:10.1155/2020/2374231), 2020-05-12
Supplement: f1 [file 2374231.f1.pdf]

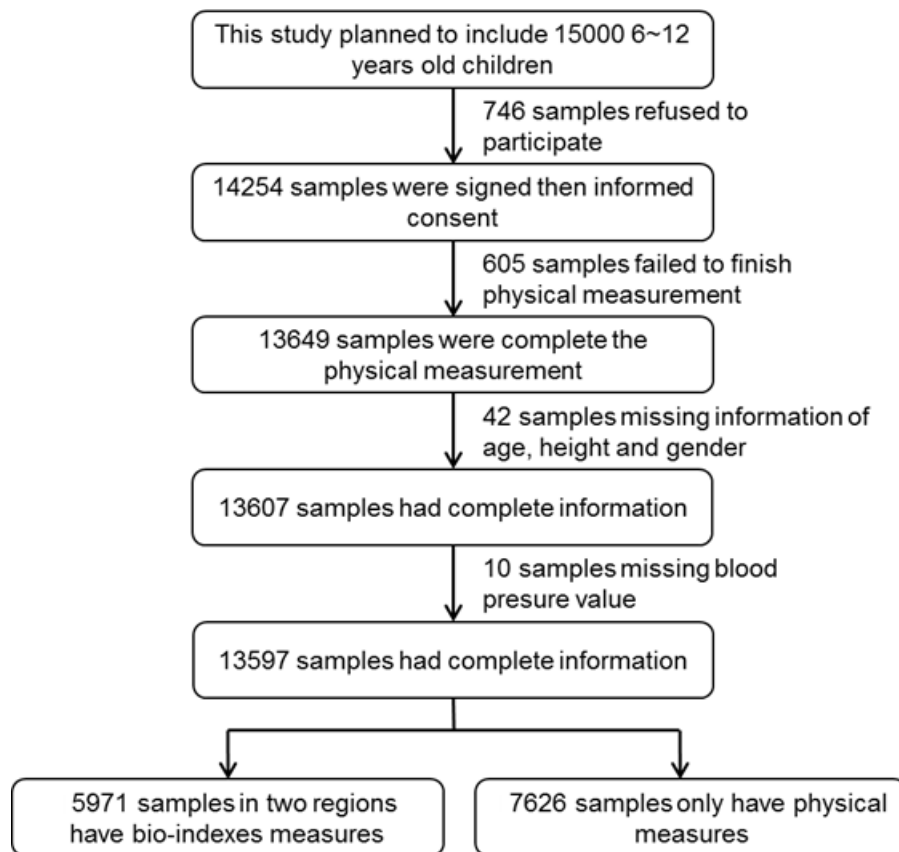

Supplementary Figure 1. The flow chart of samples included

Supplementary table 1. Dietary intakes, g/day

| Variables                | Total         | Urban vs Rural    |                   | P      |
|--------------------------|---------------|-------------------|-------------------|--------|
|                          |               | Urban<br>(n=5995) | Rural<br>(n=7602) |        |
| <b>Mean ±STD, g/day</b>  |               |                   |                   |        |
| Cereals and potatoes     | 150(100,250)  | 150(100,250)      | 150(100,250)      | 0.006  |
| Vegetables               | 150(100,250)  | 150(100,250)      | 150(100,250)      | <0.001 |
| Fruit                    | 150(71,250)   | 150(71,250)       | 142.86(71,250)    | 0.004  |
| Red meat                 | 100(50,150)   | 100(50,150)       | 100(42,150)       | <0.001 |
| Poultry                  | 35(14,71)     | 35(14,71)         | 35(14,71)         | 0.089  |
| Fish                     | 16(5,35)      | 16(7,35)          | 14(4,35)          | <0.001 |
| Eggs                     | 50(16,100)    | 50(21,100)        | 50(14,100)        | <0.001 |
| Milk                     | 250(150,250)  | 250(190,280)      | 250(142,250)      | <0.001 |
| Bean food                | 28(14,71)     | 28(14,71)         | 28(10,71)         | 0.736  |
| Nuts                     | 11(2,35)      | 14(3,35)          | 8(1,35)           | <0.001 |
| Mushrooms and algae food | 8(1,33)       | 13(3,33)          | 8(1,33)           | <0.001 |
| Oils                     | 50(40,100)    | 50(50,100)        | 50(35,100)        | 0.925  |
| Pickle                   | 7(1,21)       | 5(1,14)           | 7(1,25)           | <0.001 |
| Nutritional supplements  | 0(0,5)        | 0(0,1)            | 0(0,8)            | <0.001 |
| Beverage                 | 14(1,50)      | 14(1,33)          | 14(0,66)          | <0.001 |
| <b>Mean ±STD, g/day</b>  |               |                   |                   |        |
| Cereals and potatoes     | 204.83±158.52 | 192.61±136.66     | 212.42±170.26     | <0.001 |
| Vegetables               | 222.84±193.31 | 229.25±188.16     | 218.81±196.39     | 0.004  |
| Fruit                    | 190.45±179.43 | 188.43±166.44     | 191.70±187.00     | 0.324  |
| Red meat                 | 115.63±110.11 | 118.91±104.72     | 113.56±113.33     | 0.010  |
| Poultry                  | 60.28±83.51   | 58.58±75.81       | 61.36±88.00       | 0.074  |
| Fish                     | 38.27±75.38   | 36.02±64.64       | 39.66±81.26       | 0.007  |
| Eggs                     | 66.60±75.19   | 67.44±70.36       | 66.08±78.01       | 0.327  |
| Milk                     | 252.99±154.28 | 260.56±152.25     | 248.33±155.33     | <0.001 |
| Bean food                | 59.18±91.55   | 53.44±75.73       | 62.71±99.89       | <0.001 |
| Nuts                     | 31.65±58.52   | 28.29±49.45       | 33.71±63.36       | <0.001 |
| Mushrooms and algae food | 29.16±62.90   | 26.43±53.05       | 30.84±68.19       | <0.001 |
| Oils                     | 74.60±61.08   | 72.21±52.68       | 76.07±65.69       | <0.001 |
| Pickle                   | 19.18±35.68   | 14.15±29.08       | 22.27±38.87       | <0.001 |
| Nutritional supplements  | 18.71±64.05   | 10.24±39.38       | 23.92±74.83       | <0.001 |
| Beverage                 | 47.66±100.38  | 36.50±81.15       | 54.52±110.00      | <0.001 |

Supplementary table 2. The prevalence of hypertension combined duration of breastfed and other risk factors

| Variables | Duration of breastfed, month |        |     | $\chi^2$ | P |
|-----------|------------------------------|--------|-----|----------|---|
|           | <3                           | 4 ~ 10 | >10 |          |   |

|       |                   |            |            |            |         |        |
|-------|-------------------|------------|------------|------------|---------|--------|
| Urban | LGP†              |            |            |            |         |        |
|       | No                | 128(10.88) | 172(8.62)  | 67(8.68)   | 12.976  | 0.024  |
|       | Yes               | 20(8.33)   | 12(5.41)   | 9(16.98)   |         |        |
|       | Weight‡           |            |            |            |         |        |
|       | NR                | 73(8.01)   | 96(6.66)   | 39(7.24)   | 82.902  | <0.001 |
|       | OW                | 42(11.11)  | 54(9.23)   | 22(10.48)  |         |        |
|       | OB                | 33(25.19)  | 34(17.26)  | 15(19.48)  |         |        |
|       | Birth weight, g § |            |            |            |         |        |
|       | ~3000             | 39(9.20)   | 48(9.56)   | 25(12.63)  | 16.944  | 0.031  |
|       | ~3600             | 67(11.11)  | 99(9.16)   | 29(8.01)   |         |        |
|       | >3600             | 42(10.85)  | 36(5.70)   | 22(8.40)   |         |        |
|       | Income, RMB#      |            |            |            |         |        |
|       | <1000             | 5(6.17)    | 17(10.90)  | 6(6.98)    | 14.837  | 0.19   |
|       | ~2000             | 13(7.26)   | 26(9.22)   | 12(7.41)   |         |        |
|       | ~3000             | 32(10.03)  | 41(7.98)   | 19(9.64)   |         |        |
|       | >3000             | 98(11.89)  | 99(7.87)   | 38(10.11)  |         |        |
| Rural | LGP††             |            |            |            |         |        |
|       | No                | 184(16.68) | 441(15.96) | 391(18.79) | 8.622   | 0.125  |
|       | Yes               | 59(18.32)  | 107(19.04) | 64(18.23)  |         |        |
|       | Weight‡‡          |            |            |            |         |        |
|       | NR                | 136(13.74) | 329(14.13) | 263(15.24) | 187.379 | <0.001 |
|       | OW                | 67(21.00)  | 141(18.19) | 113(22.24) |         |        |
|       | OB                | 40(34.48)  | 80(35.09)  | 80(39.80)  |         |        |
|       | Birth weight, g § |            |            |            |         |        |
|       | ~3000             | 73(15.50)  | 169(18.09) | 137(22.20) | 18.785  | 0.016  |
|       | ~3600             | 105(19.77) | 231(16.11) | 170(17.07) |         |        |
|       | >3600             | 65(15.48)  | 149(15.57) | 146(18.02) |         |        |
|       | Income, RMB#      |            |            |            |         |        |
|       | <1000             | 52(16.51)  | 120(16.37) | 136(18.92) | 7.653   | 0.744  |
|       | ~2000             | 44(14.97)  | 135(17.22) | 113(19.45) |         |        |
|       | ~3000             | 64(19.57)  | 133(16.48) | 95(18.34)  |         |        |
|       | >3000             | 82(17.15)  | 161(16.31) | 108(18.03) |         |        |

LGP: Live with grandparents, NR: Normal weight, OW: Overweight, OB: Obesity. Missing data: † 1537 missing data, ‡ 1526 missing data, § 1544 missing data, #1561 missing data, †† 419 missing data, ‡‡ 410 missing data, §§ 432 missing data, ## 460 missing data.

**Supplementary table 3. The prevalence of hypertension combined birth weight and other risk factors**

| Variables | Birth weight, g |            |            | $\chi^2$  | P      |            |
|-----------|-----------------|------------|------------|-----------|--------|------------|
|           | ~3000           | ~3600      | >3600      |           |        |            |
| Urban     | Income, RMB†    |            |            | 8.695     | 0.650  |            |
|           | <1000           | 10(10.64)  | 7(5.98)    |           |        | 11(9.73)   |
|           | ~2000           | 13(7.69)   | 26(9.67)   |           |        | 12(6.49)   |
|           | ~3000           | 24(9.38)   | 47(9.25)   |           |        | 21(7.50)   |
|           | >3000           | 63(10.52)  | 116(10.05) | 57(7.86)  |        |            |
|           | Weight‡         |            |            | 91.671    | <0.001 |            |
|           | NR              | 70(8.95)   | 88(6.64)   |           |        | 50(6.17)   |
|           | OW              | 25(9.09)   | 66(12.18)  |           |        | 27(7.48)   |
|           | OB              | 17(22.37)  | 42(22.11)  |           |        | 24(17.14)  |
|           | LGP§            |            |            | 5.298     | 0.381  |            |
|           | No              | 101(10.15) | 176(9.65)  |           |        | 90(7.82)   |
|           | Yes             | 11(8.15)   | 20(8.70)   |           |        | 11(7.01)   |
| Rural     | Income, RMB††   |            |            | 12.034    | 0.361  |            |
|           | <1000           | 93(17.68)  | 112(15.86) |           |        | 110(19.33) |
|           | ~2000           | 85(18.12)  | 125(18.52) |           |        | 89(16.24)  |
|           | ~3000           | 92(20.67)  | 126(18.03) |           |        | 82(14.91)  |
|           | >3000           | 112(18.95) | 147(16.46) | 99(16.10) |        |            |
|           | Weight‡‡        |            |            | 204.946   | <0.001 |            |
|           | NR              | 241(15.98) | 301(14.58) |           |        | 201(12.74) |
|           | OW              | 90(21.48)  | 128(18.55) |           |        | 110(20.99) |
|           | OB              | 53(43.80)  | 84(35.29)  |           |        | 70(35.71)  |
|           | LGP§§           |            |            | 8.518     | 0.130  |            |
|           | No              | 304(18.23) | 435(17.15) |           |        | 293(15.88) |
|           | Yes             | 79(20.90)  | 76(16.89)  |           |        | 88(19.47)  |

LGP: Live with grandparents, NR: Normal weight, OW: Overweight, OB: Obesity. Missing data: † 1526 missing data, ‡ 1492 missing data, § 1503 missing data, †† 316 missing data, ‡‡ 263 missing data, §§ 272 missing data.

**Supplementary table 4. The prevalence of hypertension combined weight and LGP**

| Variables | Weight |            |            | $\chi^2$ | P      |            |
|-----------|--------|------------|------------|----------|--------|------------|
|           | NR     | OW         | OB         |          |        |            |
| Urban     | LGP†   |            |            | 79.222   | <0.001 |            |
|           | No     | 188(7.21)  | 107(10.46) |          |        | 75(20.72)  |
|           | Yes    | 22(6.79)   | 12(7.74)   |          |        | 8(18.18)   |
| Rural     | LGP‡   |            |            | 197.732  | <0.001 |            |
|           | No     | 591(14.03) | 270(19.38) |          |        | 174(37.50) |
|           | Yes    | 153(16.04) | 58(24.27)  |          |        | 33(35.48)  |

LGP: Live with grandparents. Missing data: † 1480 missing data. ‡ 248 missing data.

**Supplementary table 5. The prevalence of hypertension combined duration of breastfed and other risk factors**

| Variables | Income, RMB |            |            |            | $\chi^2$ | P      |
|-----------|-------------|------------|------------|------------|----------|--------|
|           | <1000       | ~2000      | ~3000      | >3000      |          |        |
| Urban     |             |            |            |            |          |        |
| LGP†      |             |            |            |            |          |        |
| No        | 26(9.35)    | 43(7.89)   | 86(9.33)   | 214(9.66)  | 4.913    | 0.671  |
| Yes       | 3(6.12)     | 9(11.25)   | 7(5.60)    | 22(8.24)   |          |        |
| Weight‡   |             |            |            |            |          |        |
| NR        | 21(8.61)    | 26(6.24)   | 49(7.08)   | 113(7.26)  | 77.926   | <0.001 |
| OW        | 5(8.06)     | 15(9.49)   | 28(10.22)  | 71(10.43)  |          |        |
| OB        | 3(14.29)    | 11(21.15)  | 16(18.82)  | 52(21.05)  |          |        |
|           |             |            |            |            |          |        |
| Rural     |             |            |            |            |          |        |
| LGP §     |             |            |            |            |          |        |
| No        | 231(16.75)  | 243(17.32) | 258(18.27) | 299(16.36) | 10.399   | 0.167  |
| Yes       | 84(19.72)   | 56(18.98)  | 42(14.74)  | 61(22.18)  |          |        |
| Weight#   |             |            |            |            |          |        |
| NR        | 200(14.71)  | 184(15.23) | 177(15.17) | 181(12.93) | 209.056  | <0.001 |
| OW        | 71(21.45)   | 82(21.81)  | 77(19.01)  | 98(19.07)  |          |        |
| OB        | 44(38.26)   | 34(29.31)  | 47(37.01)  | 82(42.49)  |          |        |
|           |             |            |            |            |          |        |

LGP: Live with grandparents, NR: Normal weight, OW: Overweight, OB: Obesity. Missing data: † 1514 missing data, ‡ 1505 missing data, § 299 missing data, # 290 missing data.

Supplementary table 6. Compare the Median of BP in present study with the P50 of the diagnose criteria samples

| Gender | Age, year | Height, cm | SBP  |        |        | DBP  |       |        |
|--------|-----------|------------|------|--------|--------|------|-------|--------|
|        |           |            | P50* | Mean   | Median | P50* | Mean  | Median |
| Male   | 6         | <114       | 93   | 98.40  | 98.33  | 57   | 62.97 | 62.67  |
|        |           | 114~116    | 94   | 96.69  | 96.67  | 57   | 60.43 | 60.33  |
|        |           | 117~119    | 95   | 99.01  | 99.33  | 58   | 60.20 | 59.33  |
|        |           | 120~123    | 96   | 100.57 | 100.50 | 58   | 61.94 | 62.00  |
|        |           | 124~126    | 97   | 101.19 | 101.67 | 59   | 61.79 | 61.33  |
|        |           | 127~130    | 98   | 103.44 | 103.00 | 59   | 62.84 | 62.67  |
|        |           | ≥130       | 99   | 106.04 | 106.00 | 60   | 65.72 | 65.00  |
| Male   | 7         | <118       | 94   | 98.39  | 98.17  | 58   | 61.32 | 61.67  |
|        |           | 118~120    | 95   | 99.81  | 99.67  | 58   | 62.19 | 62.50  |
|        |           | 121~123    | 96   | 100.06 | 100.00 | 59   | 61.66 | 61.33  |
|        |           | 124~127    | 97   | 101.18 | 100.67 | 59   | 62.09 | 61.67  |
|        |           | 128~131    | 98   | 102.55 | 102.83 | 60   | 62.86 | 62.17  |
|        |           | 132~135    | 100  | 105.18 | 105.00 | 61   | 63.87 | 63.00  |
|        |           | ≥136       | 100  | 106.24 | 107.33 | 62   | 63.58 | 63.67  |
| Female | 6         | <113       | 92   | 95.29  | 95.17  | 57   | 61.88 | 61.17  |
|        |           | 113~114    | 92   | 96.04  | 96.00  | 57   | 60.89 | 60.33  |
|        |           | 115~118    | 93   | 97.07  | 96.50  | 57   | 61.79 | 61.33  |
|        |           | 119~121    | 94   | 98.00  | 97.00  | 58   | 61.79 | 62.33  |
|        |           | 122~125    | 95   | 101.15 | 100.33 | 58   | 64.57 | 63.67  |
|        |           | 126~128    | 96   | 100.38 | 100.00 | 59   | 63.71 | 62.67  |
|        |           | ≥129       | 97   | 105.65 | 105.67 | 59   | 64.23 | 63.00  |
| Female | 7         | <116       | 93   | 96.09  | 96.00  | 57   | 60.86 | 61.00  |
|        |           | 116~118    | 93   | 97.29  | 97.17  | 57   | 61.91 | 61.33  |
|        |           | 119~122    | 94   | 98.37  | 98.33  | 58   | 62.60 | 62.17  |
|        |           | 123~126    | 95   | 98.88  | 99.33  | 59   | 62.50 | 61.67  |
|        |           | 127~130    | 96   | 100.55 | 100.00 | 59   | 63.03 | 62.67  |
|        |           | 131~133    | 97   | 101.12 | 100.67 | 60   | 62.50 | 61.83  |
|        |           | ≥134       | 98   | 104.88 | 104.33 | 61   | 64.94 | 65.33  |

\*Reference:FAN Hui YY-k MJ. Updating blood pressure references for Chinese children aged 3-17 years. Chin J Hypertens. 2017; 05:8
